# Supplementary material for: A census-based estimate of Earth's bacterial and archaeal diversity
Source: PubMed Central journal article supplement (PMC6361415; doi:10.1371/journal.pbio.3000106), 2019-02-04

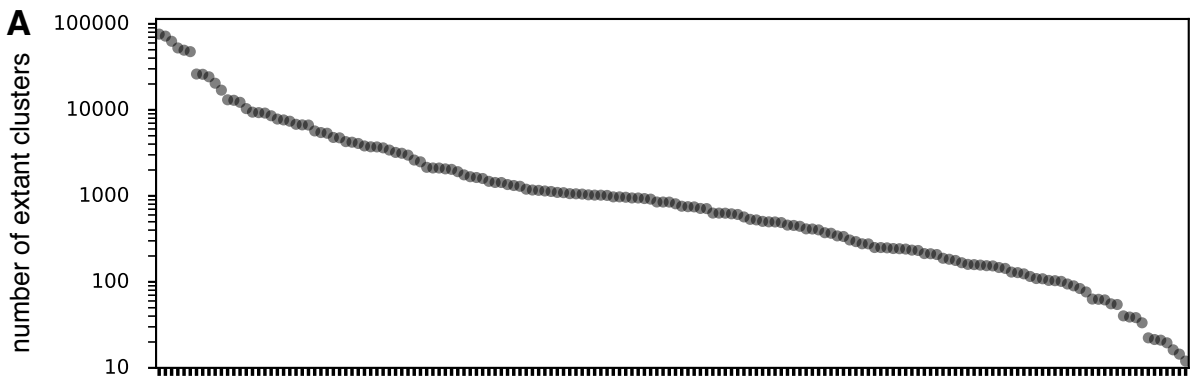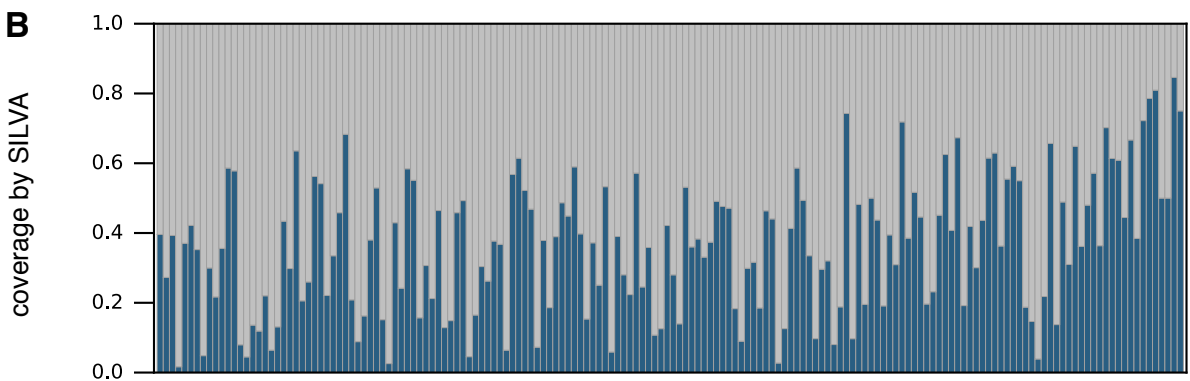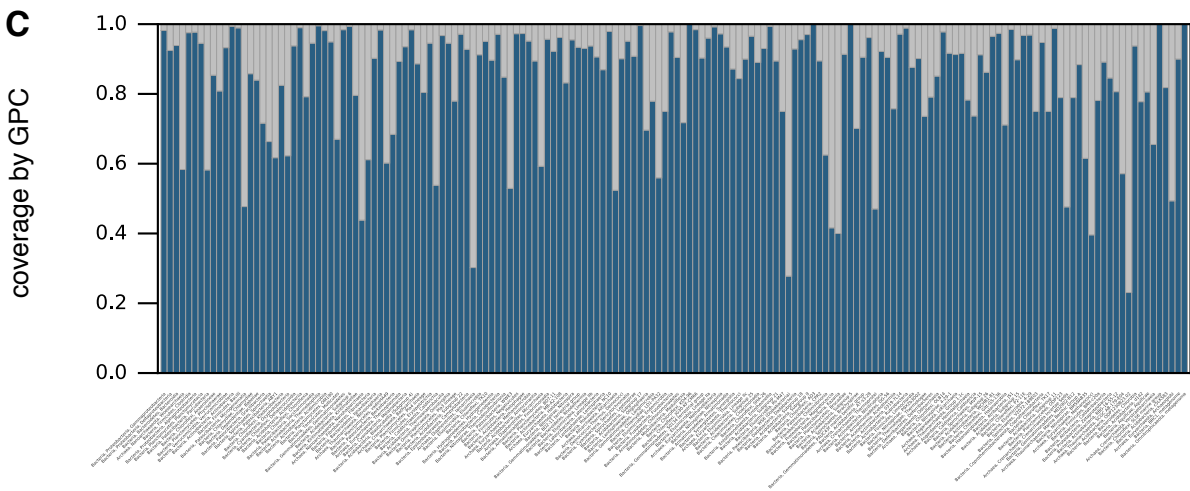

Supplement: pbio.3000106.s016.pdf [file pbio.3000106.s016.pdf]
