# Supplementary material for: A census-based estimate of Earth's bacterial and archaeal diversity
Source: PubMed Central journal article supplement (PMC6361415; doi:10.1371/journal.pbio.3000106), 2019-02-04
Supplement: pbio.3000106.s022.pdf [file pbio.3000106.s022.pdf]

**Table S2: Recapture fractions of other datasets by the GPC (at 97% similarity).**

| <b>taxon</b>   | <b>EMP</b> | <b>SILVA</b> | <b>UBA</b>     | <b>IMG/M</b> | <b>RDP</b> | <b>GTDB</b> |
|----------------|------------|--------------|----------------|--------------|------------|-------------|
| Bacteria       | 0.93       | 0.96         | 0.90 (393/436) | 0.93         | 0.89       | 0.94        |
| Archaea        | 0.81       | 0.88         | 0.92 (138/150) | NA           | 0.90       | 0.78        |
| Cyanobacteria  | 0.90       | 0.95         | 1.00 (5/5)     | 0.96         | 0.88       | 0.97        |
| Proteobacteria | 0.94       | 0.98         | 0.98 (117/120) | 0.97         | 0.91       | 0.98        |
| Firmicutes     | 0.88       | 0.98         | 0.86 (25/29)   | 0.97         | 0.95       | 0.99        |
