# Supplementary material for: A census-based estimate of Earth's bacterial and archaeal diversity
Source: PubMed Central journal article supplement (PMC6361415; doi:10.1371/journal.pbio.3000106), 2019-02-04
Supplement: pbio.3000106.s023.pdf [file pbio.3000106.s023.pdf]

**Table S3: Recapture fractions of other datasets by the GPC (at 99% similarity).**

| <b>taxon</b> | <b>EMP</b> | <b>SILVA</b> | <b>UBA</b> | <b>IMG/M</b> | <b>RDP</b> | <b>GTDB</b> |
|--------------|------------|--------------|------------|--------------|------------|-------------|
| Bacteria     | 0.82       | 0.91         | 0.80       | 0.88         | 0.80       | 0.90        |
| Archaea      | 0.62       | 0.74         | 0.86       | NA           | 0.79       | 0.66        |
