# Supplementary material for: A census-based estimate of Earth's bacterial and archaeal diversity
Source: PubMed Central journal article supplement (PMC6361415; doi:10.1371/journal.pbio.3000106), 2019-02-04
Supplement: pbio.3000106.s026.pdf [file pbio.3000106.s026.pdf]

**Table S6: Prokaryotic diversity contained in SILVA.**

| <b>taxon</b>   | <b>V4 (97%)</b> | <b>full-length (97%)</b> | <b>V4 (99%)</b> | <b>full-length (99%)</b> |
|----------------|-----------------|--------------------------|-----------------|--------------------------|
| Bacteria       | 94,552          | 256,483                  | 216,405         | 603,135                  |
| Archaea        | 5,742           | 10,934                   | 13,990          | 25,759                   |
| Cyanobacteria  | 1,641           | 2,739                    | 3,150           | 7,873                    |
| Proteobacteria | 26,718          | 77,338                   | 66,514          | 239,834                  |
| Firmicutes     | 22,050          | 75,288                   | 57,995          | 157,959                  |
