# Supplementary material for: A census-based estimate of Earth's bacterial and archaeal diversity
Source: PubMed Central journal article supplement (PMC6361415; doi:10.1371/journal.pbio.3000106), 2019-02-04
Supplement: pbio.3000106.s027.pdf [file pbio.3000106.s027.pdf]

**Table S7: Estimated numbers of living prokaryotic cells represented by the GPC (at 90%, 95%, 97% or 99% similarity).**

| <b>taxon</b>   | <b><math>N_2</math></b> | <b>P</b> |
|----------------|-------------------------|----------|
| 99% similarity | 514,347                 | 0.99881  |
| 97% similarity | 87,940                  | 0.99979  |
| 95% similarity | 40,347                  | 0.99991  |
| 90% similarity | 8,274                   | 0.99998  |
